# Supplementary material for: Molybdenum isotopic fractionation in the Panzhihua mafic layered intrusion in the Emeishan large igneous province, southwest China
Source: publisher site journal article supplement (doi:10.2138/am-2023-9154), 2023-12-19
Supplement: Supplementary file 1 [file 9154_supp.xls]

## Sheet: Table S1
American Mineralogist: March 2024 Online Materials AM-24-39154 (use tabs to navigate to other tables)
Zhang et al.: Mo isotopes in the Panzhihua mafic layered intrusion
Table S1 Mo isotopic composition and contents of the Panzhihua bulk rocks and mineral separates.
		ZJBB-63	ZJBB-59	ZJBB-57	ZJBB-1	ZJBB-5	ZJBB-7	ZJBB-10	ZJBB-14	ZJBB-19	ZJBB-22	ZJBB-27	ZJBB-31	ZJBB-39	ZJBB-43	ZJBB-48	ZJBB-50	ZJBB-55	ZJBB-33	ZJBB-35
		gabbro	gabbro	olivine gabbro	gabbro	gabbro	magnetite gabbro	gabbro	gabbro	gabbro	gabbro	magnetite gabbro	magnetite gabbro	magnetite gabbro	massive oxide	olivine gabbro	gabbro	gabbro	gabbro	magnetite gabbro
Bulk rock	Mo (ppm)	0.0602949	0.112657	0.0701706	0.0816027	0.0687591	0.136604	0.11235	0.0698495	0.0562778	0.0635314	0.133771	0.0620958	0.151152	0.347149	0.121592	0.146909	0.0918352	0.0583919	0.251487
	δ98/95Mo WR	-0.144946	-0.253277	-0.321859	-0.160676	-0.200075	-0.0859499	-0.18	-0.178817	-0.369069	-0.171598	-0.109321	-0.17662	-0.138897	-0.109396	-0.346448	-0.417128	-0.260826	-0.139634	-0.0723986
	2SE	0.0701705	0.05	0.0811306	0.0587764	0.0715849	0.0859006	0.03	0.0846186	0.0332144	0.0604208	0.0620779	0.0544447	0.0521597	0.0490852	0.0847466	0.0407959	0.0575468	0.0724159	0.0602755
Cpx	Mo (ppm)	0.0777767		0.0798875		0.0732052			0.0588041		0.0150033		0.0225248		0.0358917	0.0340846			0.0231809
	δ98/95Mo WR	-0.292575		-0.319542		-0.167979			-0.305263		-0.0972588		-0.251738		-0.21385	-0.284028			-0.124325
	2SE	0.0480736		0.0389864		0.036391			0.0283177		0.0694498		0.0747743		0.0661715	0.0629736			0.0652641
Pl	Mo (ppm)	0.0345108		0.0614279		0.0486185			0.0244482		0.0277945		0.0634538		0.0570923	0.0493727			0.0733155
	δ98/95Mo WR	0.330297		0.479482		0.466797			0.40191		0.53644		0.544206		0.754559	0.542369			0.829727
	2SE	0.0672849		0.0261435		0.0330353			0.0701544		0.0703879		0.0440479		0.0376502	0.064832			0.0321806
Mt	Mo (ppm)	0.599177		0.346666		0.388153			0.729044		0.364738		0.277481		0.701503	0.558308			0.258729
	δ98/95Mo WR	-0.316727		-0.517075		-0.725339			-0.679795		-0.511792		-0.68388		-0.568769	-0.466356			-0.625855
	2SE	0.0321149		0.0599382		0.0612831			0.0431217		0.0544291		0.0699984		0.0334571	0.0471828			0.0537477
Ilm	Mo (ppm)	0.533667		0.238671		0.534637			0.432973		0.294083		0.334331		0.731793	0.445831			0.211841
	δ98/95Mo WR	0.140143		0.126821		0.113047			0.198629		0.316557		0.360247		0.231831	0.0605998			0.151864
	2SE	0.0462068		0.053589		0.0343596			0.0505905		0.0600966		0.0570887		0.0464775	0.0503661			0.0821308

## Sheet: Table S2
American Mineralogist: March 2024 Online Materials AM-24-39154 (use tabs to navigate to other tables)
Zhang et al.: Mo isotopes in the Panzhihua mafic layered intrusion
Table S2 Major and trace elements of the Panzhihua bulk-rock samples.
	wt%												ppm
	SiO2	TiO2	Al2O3	Fe2O3T	MnO	MgO	CaO	Na2O	K2O	P2O5	L.O.I	Total	Sc	V	Cr	Mn	Co	Ni	Cu	Zn	Ga	Ge	Rb	Sr	Y	Zr	Nb	Cs	Ba	La	Ce	Pr	Nd	Sm	Eu	Gd	Tb	Dy	Ho	Er	Tm	Yb	Lu	Hf	Ta	Th	U
ZJBB-63	39.5	4.17	14.42	17.89	0.21	6.1	12.1	2.64	0.14	2.48	0.06	99.71	13.7	187	70.8	1647	44.5	3.46	17.2	119	20	1.09	0.91	918	27.5	13.2	3.14	0.05	98.8	18.9	51.2	8.54	44.8	10.6	3.64	10.84	1.26	6.32	1.06	2.15	0.24	1.19	0.15	0.43	0.29	0.23	0.07
ZJBB-59	44.39	2.75	18.46	12.81	0.15	4.47	11.7	3.44	0.21	1.46	0.08	99.92	9.38	165	91.3	1115	31.9	4.39	11.7	83.4	21	0.93	1.23	1041	17.6	9.86	2.1	0.03	131	12.3	33	5.37	27.9	6.46	2.76	6.79	0.78	3.97	0.66	1.43	0.15	0.8	0.1	0.32	0.19	0.15	0.05
ZJBB-57	34.18	6.38	9.3	24	0.27	8.12	13.48	1.48	0.09	2.76	-0.57	99.49	22.5	495	67.9	2119	71.8	3.54	30.1	163	18	1.25	0.63	559	31.4	18.6	3.91	0.02	55.1	18.6	52.3	9.2	49.5	11.9	3.83	12.69	1.39	7.48	1.24	2.5	0.28	1.46	0.18	0.67	0.42	0.21	0.06
ZJBB-1	38.71	4.3	13.72	18.69	0.21	6.38	12.64	2.43	0.13	2.55	-0.06	99.7	11.5	253	73.7	1626	53.9	3.7	19.2	129	20.1	1	0.83	820	28.3	13.8	3.11	0.06	94.9	20.4	54.9	9.27	48.9	11.3	3.91	12.1	1.36	6.64	1.14	2.47	0.26	1.36	0.18	0.49	0.32	0.22	0.06
ZJBB-5	38.69	4.46	13.28	17.94	0.2	6.35	13.8	2.51	0.13	2.52	-0.18	99.7	15.3	326	85	1509	53.1	3.79	20.5	118	19	1.02	0.67	723	25.7	13.1	2.63	0.03	78.6	15.9	45.3	7.74	42	10.1	3.6	10.6	1.19	6.02	1.04	2.16	0.23	1.17	0.15	0.53	0.28	0.19	0.05
ZJBB-7	32.9	11.46	10.5	26.35	0.25	5.82	10.37	1.64	0.11	0.02	0.03	99.45	25.6	614	58.6	1874	79.2	2.67	36.4	177	19.3	0.96	0.67	501	7.1	29.4	4.39	0.06	65.7	1.47	4.59	0.88	5.26	1.69	0.93	2.04	0.28	1.57	0.31	0.7	0.09	0.5	0.07	1.06	0.3	0.03	0.01
ZJBB-10	38.7	6.7	12.93	21	0.21	5.91	12.19	1.99	0.17	0.05	-0.16	99.69	26.9	543	77.5	1584	67.5	4.52	30.3	129	19.2	0.98	1.47	594	7.79	21.9	3.58	0.04	85.5	2.09	6.01	1.11	6.32	1.95	1.11	2.33	0.31	1.8	0.34	0.75	0.1	0.56	0.08	0.85	0.33	0.07	0.02
ZJBB-14	42.32	4.73	18.69	15.08	0.14	3.09	10.75	3.38	0.35	0.05	1.25	99.83	13.2	352	56.1	1052	40.8	3.23	15.3	91	21.9	0.75	3.29	1065	4.97	18.1	1.03	0.14	219	2.69	6.61	1	5.06	1.35	1.08	1.47	0.2	1.13	0.21	0.47	0.06	0.35	0.05	0.63	0.03	0.1	0.03
ZJBB-19	37.58	6.45	13.63	21.82	0.19	5.64	11.75	1.98	0.14	0.01	0.43	99.62	38.8	530	83.3	1663	71.4	5.02	30.8	119	16.8	1.21	0.66	535	9.86	24.3	3.84	0.01	61.1	1.89	6	1.16	6.96	2.27	1.16	2.86	0.38	2.21	0.39	0.92	0.11	0.66	0.09	0.94	0.32	0.04	0.01
ZJBB-22	39.02	7.17	11.59	19.73	0.21	7.2	13.02	1.73	0.1	0.02	-0.12	99.67	38.9	563	99.4	1681	81.7	9.92	41.5	126	17.7	1.13	0.67	564	8.35	24.7	6.7	0.01	65.2	1.93	5.63	1.05	5.95	1.94	1.02	2.3	0.32	1.81	0.35	0.78	0.1	0.53	0.08	0.96	0.71	0.06	0.02
ZJBB-27	26.89	12.29	7.17	35.59	0.29	7.54	10.05	0.76	0.06	0.01	-0.61	100.04	34.4	1145	76	2195	133	13.9	53.1	230	21.4	0.98	0.49	336	7.18	27.6	7.74	0.03	41.8	1.36	4.32	0.84	5.09	1.68	0.75	2.03	0.29	1.67	0.31	0.73	0.09	0.51	0.07	1.14	0.87	0.04	0.01
ZJBB-31	33.58	5.82	10.41	29.02	0.22	8.95	10.58	1.25	0.1	0.01	-0.49	99.45	27.9	945	91.9	1736	130	66	136	165	21.5	1	0.8	390	6.32	18.6	2.08	0.05	45.7	1.5	4.44	0.82	4.65	1.43	0.71	1.79	0.24	1.37	0.25	0.57	0.08	0.42	0.07	0.73	0.21	0.05	0.02
ZJBB-39	32.18	7.34	12.29	29.41	0.23	5.02	11.06	1.38	0.14	0.05	0.31	99.41	22.9	912	67.3	1715	99.4	15.3	61.7	188	24.7	0.48	1.35	483	6.34	22.7	3.3	0.06	86.5	2.97	7.38	1.15	5.86	1.59	0.86	1.8	0.25	1.36	0.26	0.6	0.08	0.43	0.06	0.87	0.31	0.17	0.04
ZJBB-43	13.9	14.88	6.07	54.54	0.39	5.38	4.92	0.34	0.05	0.01	-0.37	100.11	19.8	1967	46	2636	167	56.3	70	357	33.8	0.74	0.47	131	2.84	20.6	3.97	0.02	23	0.83	2.38	0.41	2.27	0.7	0.35	0.88	0.12	0.64	0.12	0.3	0.04	0.21	0.03	0.8	0.39	0.04	0.01
ZJBB-48	40.22	2.06	4.63	21.1	0.31	19.98	10.15	0.62	0.16	0.03	0.32	99.58	25.2	217	1715	2031	89.5	694	34.7	111	8.79	0.99	3.68	141	7.87	16.8	0.81	0.21	40.8	1.86	5.57	1.02	5.78	1.8	0.75	2.19	0.31	1.76	0.33	0.77	0.09	0.56	0.08	0.74	0.07	0.15	0.03
ZJBB-50	40.21	3.62	11.93	19.74	0.17	7.14	13.69	1.61	0.5	0.06	0.97	99.64	35.2	606	62.3	1309	76.8	19.3	76.4	101	18.7	1.04	8.96	571	9.2	25.9	2.11	0.38	182	3.11	8.5	1.43	7.62	2.21	1.03	2.46	0.35	2	0.37	0.92	0.1	0.65	0.09	0.99	0.17	0.17	0.05
ZJBB-55	43.3	3.68	14.24	18.38	0.22	5.25	9.9	3.55	0.24	0.41	0.69	99.86	29.3	410	57.3	1705	57	15.4	32.8	102	25.9	1.33	1.51	868	28.6	151	24.2	0.04	339	27.2	65.8	9.26	41.5	8.91	2.96	7.91	1.09	5.86	1.07	2.66	0.36	2.14	0.31	3.96	1.65	0.05	0.02
ZJBB-33	38.29	7.26	11.69	20.56	0.2	6.7	12.49	1.84	0.19	0.02	0.4	99.64	31	549	53.2	1541	75.3	8.19	38	126	17.6	1.03	1.84	591	7.69	22.8	5.29	0.06	87.3	1.67	4.98	0.96	5.65	1.85	1.05	2.27	0.31	1.74	0.33	0.77	0.09	0.51	0.08	0.91	0.63	0.04	0.01
ZJBB-35	31.59	11.06	10.54	28.46	0.24	6.07	10.1	1.48	0.15	0.02	-0.29	99.42	27.5	743	66.5	1860	102	8.91	36.1	158	20.7	0.92	1.5	483	6.08	25.6	0.93	0.08	64.1	1.5	4.39	0.78	4.6	1.46	0.83	1.66	0.24	1.36	0.26	0.59	0.08	0.41	0.06	0.96	0.05	0.05	0.01

## Sheet: Table S3
American Mineralogist: March 2024 Online Materials AM-24-39154 (use tabs to navigate to other tables)
Zhang et al.: Mo isotopes in the Panzhihua mafic layered intrusion
Table S3 Mass balance modeling parameter settings.
mineral	deltaMo	Mo	TiO2	Fe2O3(t)	references for TiO2 and Fe2O3(t) contents
Pl	0.542865	0.0488927	0.08	0.275	Zhang et al., 2011
Cpx	-0.228507	0.0467065	1	15	Hou et al., 2012; Pang et al., 2009
Mt	-0.566176	0.469311	5	90	Liu et al., 2015
Ilm	0.18886	0.417536	53	44	Zheng et al., 2014

## Sheet: Table S4
American Mineralogist: March 2024 Online Materials AM-24-39154 (use tabs to navigate to other tables)
Zhang et al.: Mo isotopes in the Panzhihua mafic layered intrusion
Table S4 Rayleigh fractionation modeling parameter settings.
	Mo (ppm)	δ98/95Mo	DMo @ QFMa	DMo @ QFM-2
initial melt	0.115604	-0.201944
Pl	0.0488927	0.542865	0.01	0.1
Cpx	0.0467065	-0.228507	0.01	0.1
Mt	0.469311	-0.566176	0.6	10
Ilm	0.417536	0.18886	0.56	9.3
a The Mo partitional coefficients of clinopyroxene and magnetite are from Leitzke et al. (2017) and Sievwright et al. (2020). At present, no fO2-dependent DMo for plagioclase is reported and we assumed that the Mo partitional coefficient of plagioclase is similar to that of clinopyroxene, which is supported by the similar Mo contents in plagioclase and clinopyroxene of the Panzhihua intrusion. Th…
